# Supplementary material
Source: PubMed Central journal article supplement (PMC5975978)
Supplement: NIHMS948442-supplement-supplement_1.pdf [file NIHMS948442-supplement-supplement_1.pdf]

**Table S1.** Prevalence Ratios (PR) of overweight/obesity from an adjusted log-binomial model by length of time in the U.S. among foreign-born Mexican-Americans (N=518) compared to U.S.-born Mexican-Americans (N=3,064) (Total N=3,582)

|                             | N     | PR   | 95% CI |      |
|-----------------------------|-------|------|--------|------|
| Length of time in the U.S.* |       |      |        |      |
| U.S.-born Mexican-Americans | 3,064 | ref  | -      | -    |
| < 5 years                   | 180   | 0.94 | 0.79   | 1.10 |
| 5-10 years                  | 299   | 0.97 | 0.83   | 1.14 |
| >10 years                   | 16    | 0.15 | 0.05   | 0.48 |
| Missing**                   | 23    | 1.11 | 0.77   | 1.60 |

Data are from the National Health and Nutrition Examination Surveys, 2005-2014

\*Adjusted for age (continuous), sex (male/female), householder marital status (married/unmarried), and householder education (<12<sup>th</sup> grade / ≥12<sup>th</sup> grade (high school diploma, includes GED))

\*\* Foreign-born Mexican-Americans with missing data on length of time in the U.S.
